# Supplementary material for: Lipase immobilization on facile synthesized polyaniline-coated silver-functionalized graphene oxide nanocomposites as novel biocatalysts: stability and activity insights
Source: Royal Society of Chemistry journal article supplement (doi:10.1039/c6ra27926k), 2017-01-01
Supplement: c6ra27926k1.pdf [file c6ra27926k1.pdf]

**Table S1. Immobilization of lipase on PANI/Ag/GO after optimizing all conditions**

| Enzyme loaded (X)<br>(U) | Enzyme activity in washes (Y)<br>(U) | Enzyme activity bound to PANI/Ag/GO-NC |               |                                       | Immobilization yield (%)<br>(B/A x 100) |
|--------------------------|--------------------------------------|----------------------------------------|---------------|---------------------------------------|-----------------------------------------|
|                          |                                      | Theoretical<br>(X-Y)=(A)               | Actual<br>(B) | Effectiveness factor ( $\eta$ )=(B/A) |                                         |
| 7                        | 0.4                                  | 6.6                                    | 6.2           | 0.94                                  | 94                                      |

Each value represents the mean for three independent experiments performed in triplicates, with average standard deviations, < 5%.
